# Supplementary material
Source: publisher figshare collection journal article supplement (https://acs.figshare.com/ndownloader/files/4608484)
Supplement: Supplementary file 1 [file 4608484]

# VB/MM – The Validity of the Approximations

Avital Sharir-Ivry, Avital Shurki<sup>†\*</sup>

Department of Medicinal Chemistry and Natural Products, The Lise Meitner-Minerva Center for Computational Quantum Chemistry, School of Pharmacy, The Hebrew University of Jerusalem, Jerusalem 91120, Israel

## Supporting Information

### Table of Content

|                                                           |   |
|-----------------------------------------------------------|---|
| 1. Figure 1S. Comparison of $S_{ij}$ , $\beta_{ij}$ ..... | 2 |
| 2. Figure 2S. Comparison of $\Delta E$ .....              | 3 |
| 3. Figure 3S. Comparison of weights .....                 | 3 |
| 4. Figure 4S. Comparison of dissociation curves.....      | 4 |

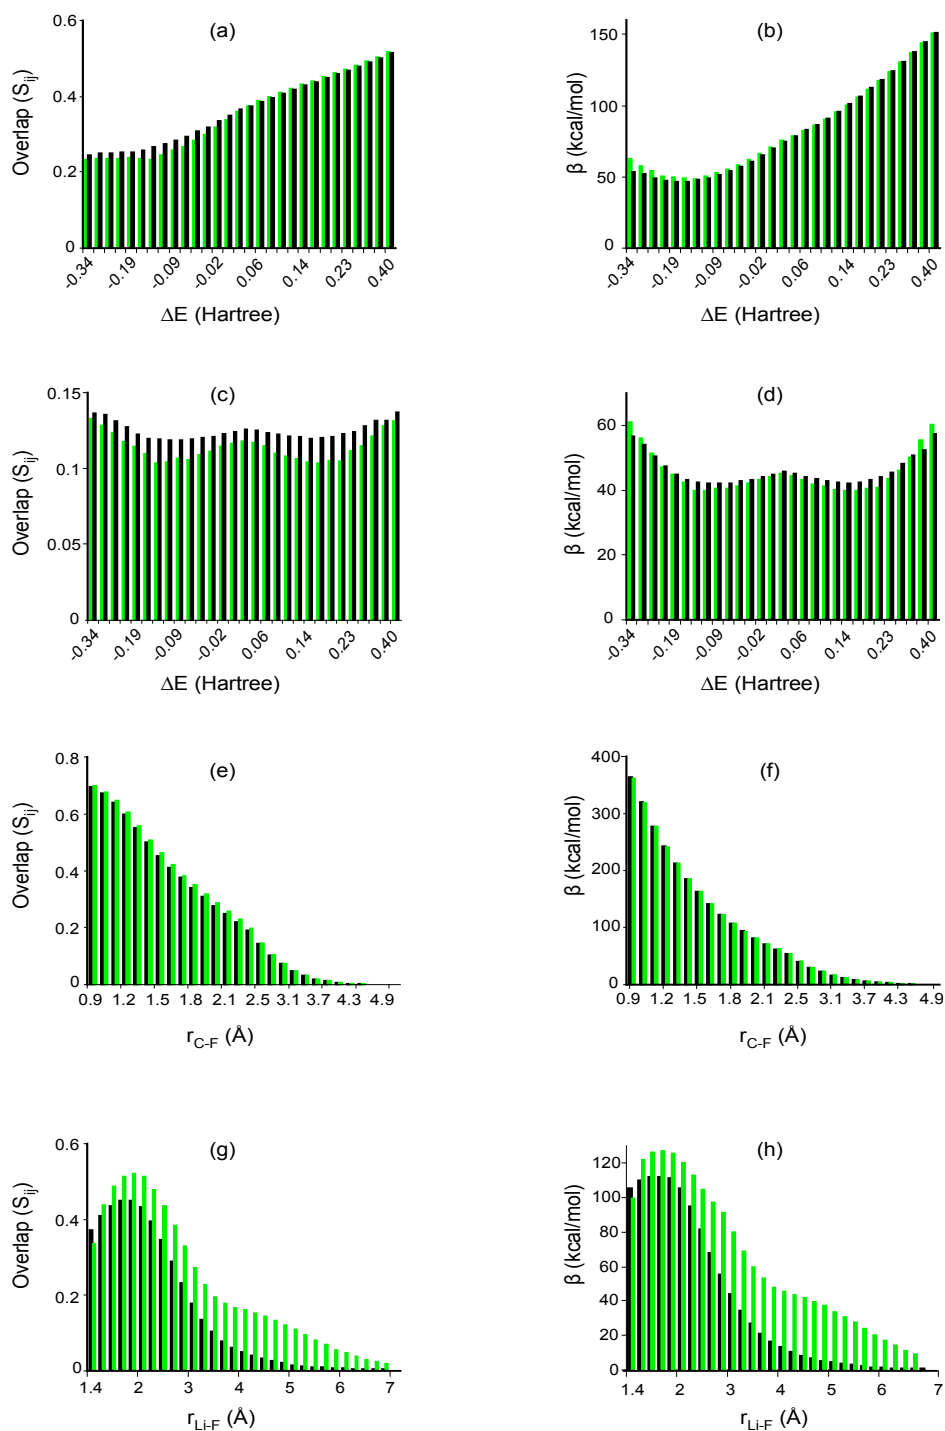

**Figure 1S.** (a) overlap and (b) reduced resonance integral values between  $\phi_{cov}^P$ , **6** and  $\phi_{ion}$ , **7** VB configurations and (c) overlap and (d) reduced resonance integral values between  $\phi_{cov}^R$ , **5** and,  $\phi_{cov}^P$  **6** VB configurations of various geometries along the  $S_N2$  reaction. (e) overlap and (f) reduced resonance integral values between  $\phi_{cov}$ , **3** and  $\phi_{ion}$ , **4** VB configurations of various geometries along the  $CH_3F$  dissociation. (g) overlap and (h) reduced resonance integral values between  $\phi_{cov}$ , **1** and  $\phi_{ion}$ , **2** VB configurations of various geometries along the LiF dissociation. Black bars present the overlap values in the gas phase whereas green bars present the values in solution.

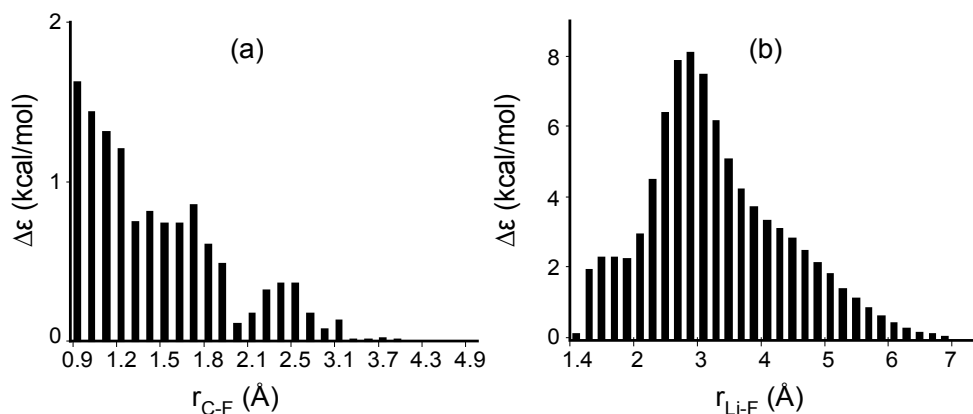

**Figure 2S.** The absolute energy differences between eigenvalues calculated with and without the approximations for various geometries along (a)  $\text{CH}_3\text{F}$  and (b)  $\text{LiF}$  dissociation curves.

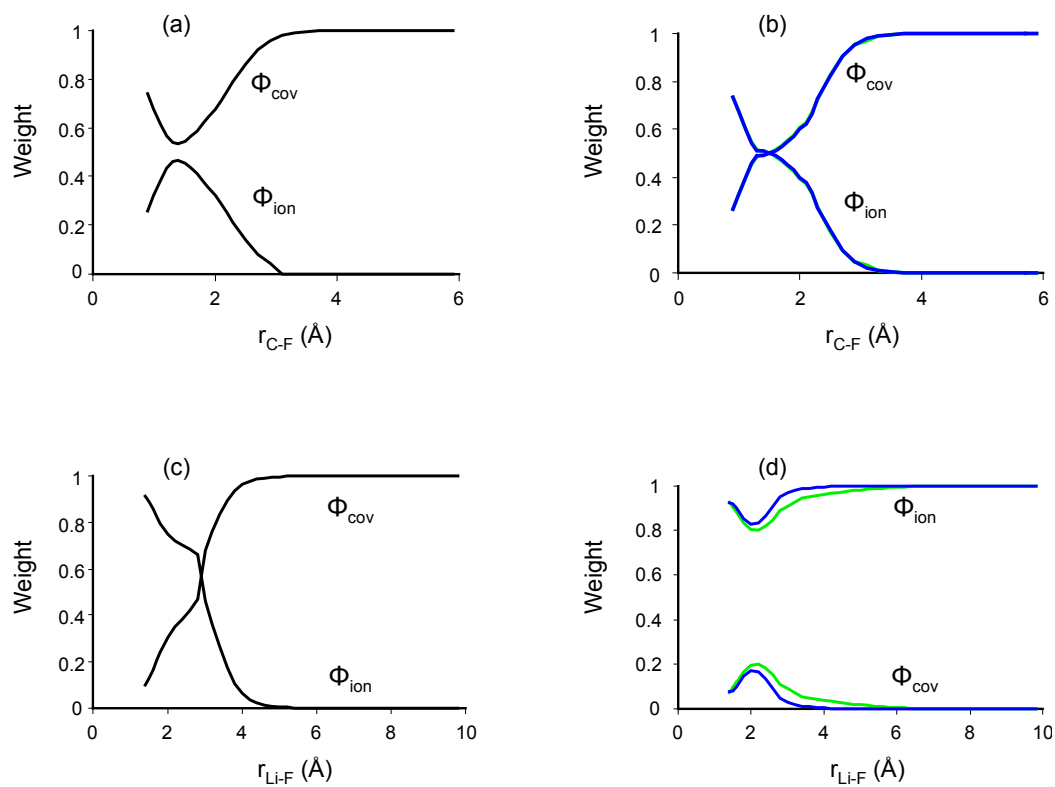

**Figure 3S.** Weights of the various VB configurations that compose the overall wave function of the gas phase (a) and solution (b)  $\text{CH}_3\text{F}$  dissociation curves, and the gas phase (c) and solution (d)  $\text{LiF}$  dissociation curves. Solution weights are calculated with the VB/MM (blue) and the DE-VB/MM (green) methods.

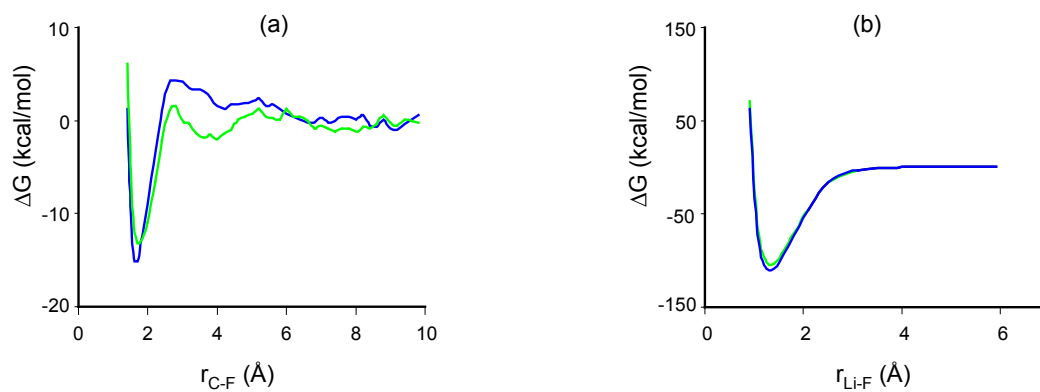

**Figure 4S.** Dissociation curves of the  $\text{CH}_3\text{F}$  (a) and  $\text{LiF}$  (b) calculated with VB/MM (blue) and DE-VB/MM (green) methods.
